# Supplementary material
Source: MDPI journal article supplement (https://www.mdpi.com/2306-5338/10/9/181)
Supplement: s1 [file s1]

## Supplementary material

### Relating Lake Circulation Patterns to Sediment, Nutrient, and Water Hyacinth Distribution in a Shallow Tropical Highland Lake

Mebrahtom G. Kebedew, Seifu A. Tilahun, Fasikaw A. Zimale, Mulugeta A. Belete, Mekete D. Wosenie, and Tammo S. Steenhuis.

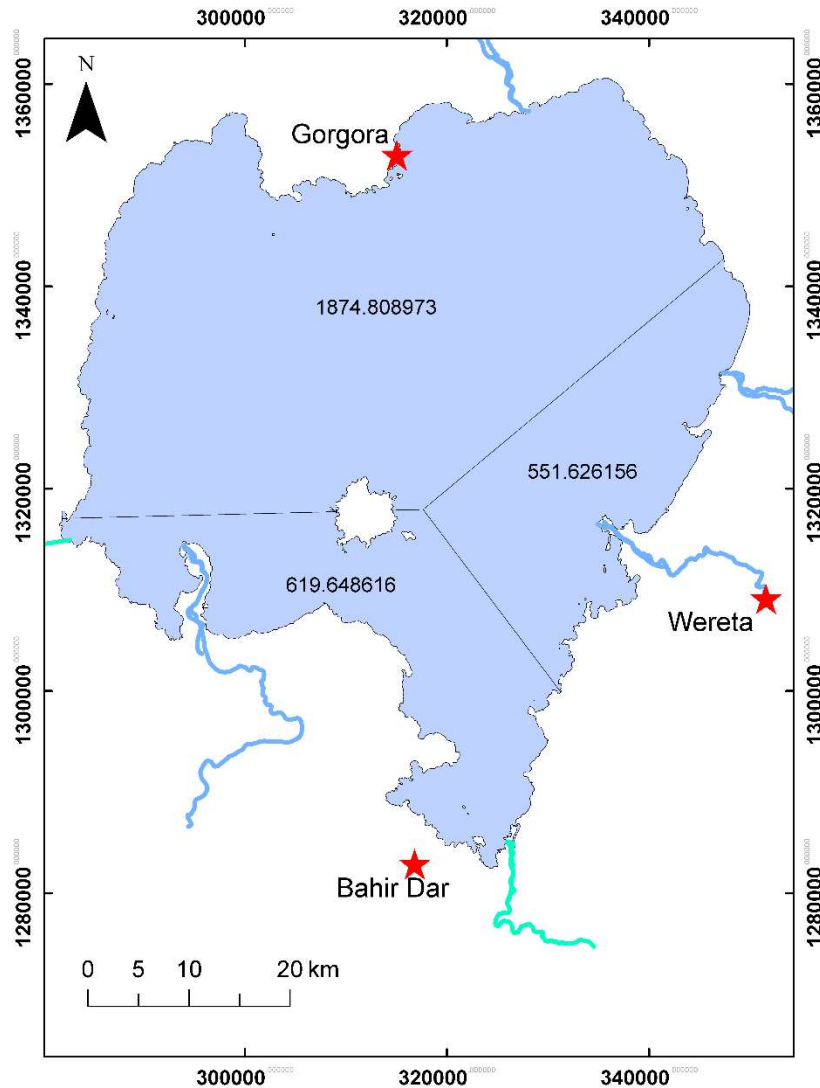

Figure S1. Thiessen polygon for calculating precipitation on the Lake Tana.
